# Supplementary material for: Combination of Hairy Root and Whole-Plant Transformation Protocols to Achieve Efficient CRISPR/Cas9 Genome Editing in Soybean
Source: Plants (Basel). 2023 Feb 23;12(5):1017. doi: 10.3390/plants12051017 (PMC10005656; doi:10.3390/plants12051017)
Supplement: Supplementary file 1 [file plants-12-01017-s001.zip › Supplementary Tables.xlsx]

## Sheet: Table S1
Table S1. Correlation of editing efficiency of hairy root transformation and whole plant transformation.
gRNAs	Gene locus	Gene editing efficiency
		Hairy root	Whole plant
Tar1-1	05G122200	0.714	0.4
Tar1-1	08G077200	0.571	0.4
Tar2-1	15G049200	0.608	0.285
Tar2-1	08G183500	0.695	0.428
Tar3-1	18G301100	0.777	0.6
Tar3-1	08G360500	0.888	0.4
Tar4-1	05G012300	0.6	0.2142
Tar4-1	17G012400	0.35	0.0714
Tar4-2	05G012300	0.55	0.1428
Tar4-2	17G012400	0.45	0.1071
Tar5-2	19G170100	0.45	0.2
Tar5-2	03G168700	0.5	0.3333
Tar6-1	13G297700	0.05	0.027
Tar6-1	12G203900	0.1	0.027
Tar6-2	13G297700	0.5	0.1905
Tar6-2	12G203900	0.35	0.2143

## Sheet: Table S2
Table S2. Primers used in this study.
Primer	Sequence (5'-3')
GUS-pcr-F	AAGGAAATCCGCAACCATAT
GUS-pcr-R	TGCGACCACTTTGCCTTCCT
GUS5'-Target1-F	GATTGATCGCGAAAACTGTGGAAT
GUS5'-Target1-R	AAACATTCCACAGTTTTCGCGATC
GUS5'-Target2-F	GATTGCAGATATTCGTAATTATGC
GUS5'-Target2-R	AAACGCATAATTACGAATATCTGC
GUS3'-Target1-F	GATTGATCGCGTCAGCGCCGTCGT
GUS3'-Target1-R	AAACACGACGGCGCTGACGCGATC
GUS3'-Target2-F	GATTGCGTTGGCGGTAACAAGAAA
GUS3'-Target2-R	AAACTTTCTTGTTACCGCCAACGC
PDS-1-F	GATTGCATTAATGATCGGTTACAA
PDS-1-R	AAACTTGTAACCGATCATTAATGC
Cas9-F	TGAGATCATCGAGCAAATCT
Cas9-R	ATTACATGTTAATTATTACA
gRNA1-1-05G122200seq-F	TGTAAGTATCTGAACACAGT
gRNA1-1-05G122200seq-R	AATTGGTAGCATCCTACTTT
gRNA1-1-08G077200seq-F	GAAACGTCATTTCCTTCATGGT
gRNA1-1-08G077200seq-R	AAGTTCTGCAGTTAAAAATC
gRNA2-1-08G183500seq-F	GTAACATCATTTCTGTGATGGT
gRNA2-1-08G183500seq-R	CTTTTGCCTGCAGATAATTAAT
gRNA2-1-15G049200seq-F	GTAACATGATTTCTGTGATGG
gRNA2-1-15G049200seq-R	GCCTGCAAACAAGGTGAGAG
gRNA3-1-18G301100seq-F	AGCAGCGTCAGTTCCTGCATG
gRNA3-1-18G301100seq-R	CAGAATCCCTTACTTTTCT
gRNA3-1-08G360500seq-F	AGCTCCTGCATGAGATTTAG
gRNA3-1-08G360500seq-R	CTTACATTGGAGCCAAGAATAC
gRNA4-1/2-05G012300seq-F	AGCGACCTTAGAAATTCATT
gRNA4-1/2-05G012300seq-R	GTAACCACCCATATCAAGTTCT
gRNA4-1/2-17G012400seq-F	AACGGCATGAAATTTGAAATG
gRNA4-1/2-17G012400seq-R	AGGCAGTTTGCTTAACTACA
gRNA5-1/2/3/4/5-19G170100seq-F	GTACTCCCTCTCTTCTTCTC
gRNA5-1/2/3/4/5-19G170100seq-R	CACTCTCCACAATCCTGCACC
gRNA5-1/2/3/4/5-03G168700seq-F	TCTGCTCTCATCTCATTCAT
gRNA5-1/2/3/4/5-03G168700seq-R	AATGACATGATCCCCAGGCT
gRNA6-1/2/3-13G297700seq-F	TTGATGAGGCTGTGCCCCAG
gRNA6-1/2/3-13G297700seq-R	GATCCTCGGATTACTGTTCC
gRNA6-1/2/3-12G203900seq-F	AGGCTATGCCCCAGTTGGAT
gRNA6-1/2/3-12G203900seq-R	CCTTGGATTACTGTTCCCTG
gRNA7-1-18G003900seq-F	ATCATATTATTTAATCAATAC
gRNA7-1-18G003900seq-R	TCAAATGCATTGAGATATATTC
gRNA7-1-11G253000seq-F	TGAAATATTTTGATATATCT
gRNA7-1-11G253000seq-R	TCAATGATTATCAAATGCATTG
gRNA8-1-08G163900seq-F	CACATGCACTTCACTTTGTTGC
gRNA8-1-08G163900seq-R	CTACAACCACAATTGTGACTGC
gRNA8-1-15G263300seq-F	GTCTTGGTTACCTCCGATCT
gRNA8-1-15G263300seq-R	AGAAACTACCTCTAGATCAA
gRNA9-1-10G009200seq-F	ATGGAAGCTAGATTTGGAGCTG
gRNA9-1-10G009200seq-R	CTACTGCATTGTTGACAGAATC
gRNA9-1-02G008600seq-F	ATGGAAGCTAAATTTGGAGC
gRNA9-1-02G008600seq-R	CTACTACATTGTTGACAGAATC
gRNA10-1-04G044000seq-F	GAGCGCTCCTCCTCCTTTCT
gRNA10-1-04G044000seq-R	CAACCGCTTAACATCATATTTA
gRNA10-1-06G044200seq-F	GTGGCGGATTTGGAGTTCGAC
gRNA10-1-06G044200seq-R	CTAAAAGCCGCCTAACTGGGAGAT
gRNA11-1-04G003200seq-F	AGCTCATCGAGAATGTCGAA
gRNA11-1-04G003200seq-R	TAGACAAGGACGAAAGTGCC
gRNA12-1-05G012300seq-F	ATGCAGCGACCTTAGAAATTC
gRNA12-1-05G012300seq-R	GATTAAGTGCAGTTTCCTGT
gRNA13-1-13G161900seq-F	GATACAATGATGCAGGCCAT
gRNA13-1-13G161900seq-R	TGAACAAATTCTACAGACAG
gRNA14-1-20G012000seq-F	TCAATGACTGGAAAGGATTTG
gRNA14-1-20G012000seq-R	TTGTGTTGGCTGGCTACCTG
